# Supplementary material
Source: Royal Society of Chemistry journal article supplement (doi:10.1039/d6nj00717a)
Supplement: d6nj00717a1.pdf [file d6nj00717a1.pdf]

## Supplementary Information

### Facile one-pot fabrication of versatile N-doped carbonaceous hybrids with hollow architecture

Xin Wang<sup>a</sup>, Jiawei Fu<sup>b,c</sup>, Tong Wu<sup>a</sup>, Longyang Wang, Changzi Jin<sup>a\*</sup>, Rui Wang<sup>a</sup>,

Heng Jiang<sup>a</sup>, Xin Liu<sup>b,c\*</sup>

<sup>a</sup>School of Petrochemical Engineering, Liaoning Petrochemical University, Fushun, 113001, China

<sup>b</sup>School of Materials Science and Engineering, Northeastern University, 110819, Shenyang, China

<sup>c</sup>School of Resources and Materials, Northeastern University at Qinhuangdao, Qinhuangdao, 066004, China

Email: [jin\\_chz@163.com](mailto:jin_chz@163.com) (Changzi Jin), [liuxinnumber1@foxmail.com](mailto:liuxinnumber1@foxmail.com) (Xin Liu)

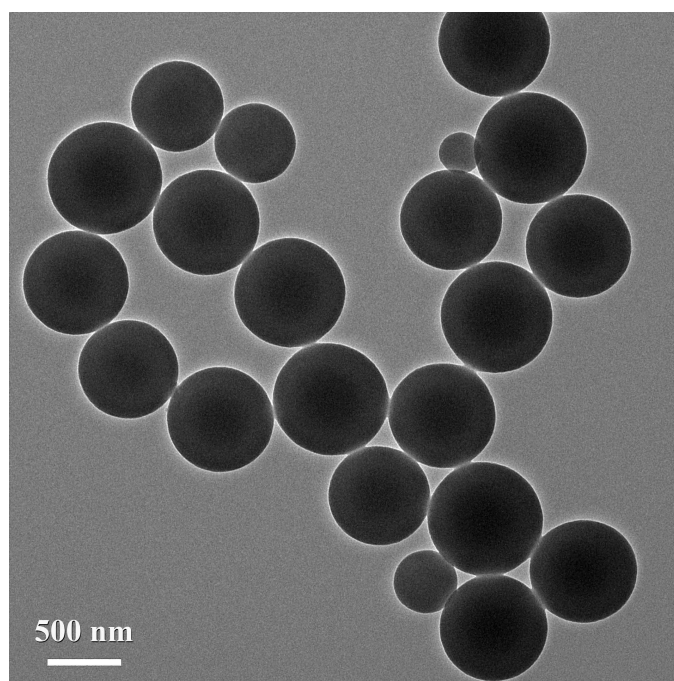

Fig. S1 TEM image of product from conventional extended Stöber process

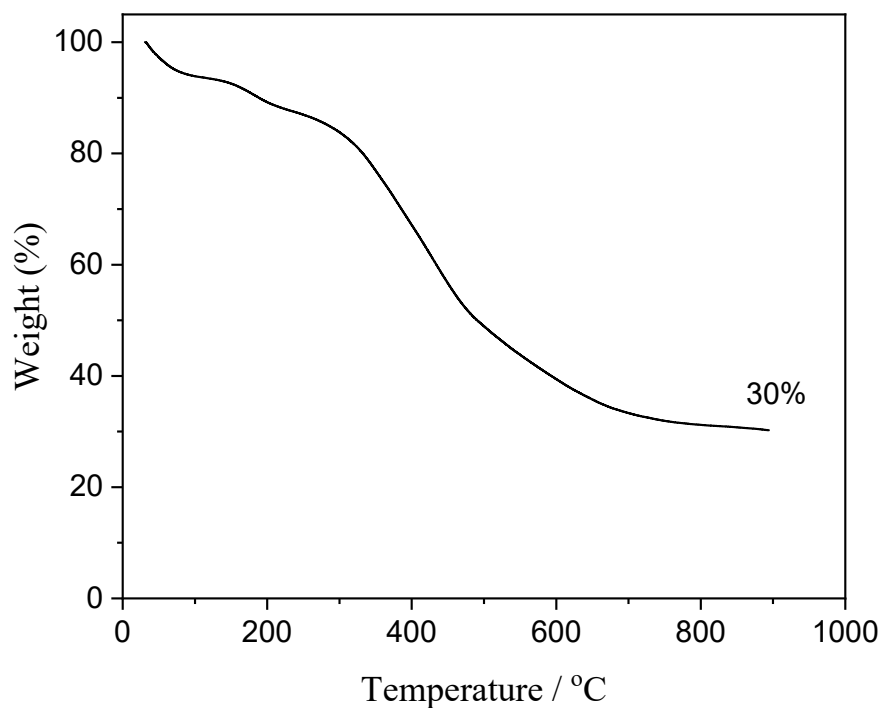

Fig. S2 TG curve of H-APF under N<sub>2</sub> atmosphere

Table S1 Element analysis for carbon hollow spheres

| Sample | N(wt%) | C(wt%) | H(wt%) |
|--------|--------|--------|--------|
| H-C    | 3.2    | 72.4   | 3.0    |
| H-NC   | 12.3   | 69.8   | 2.0    |

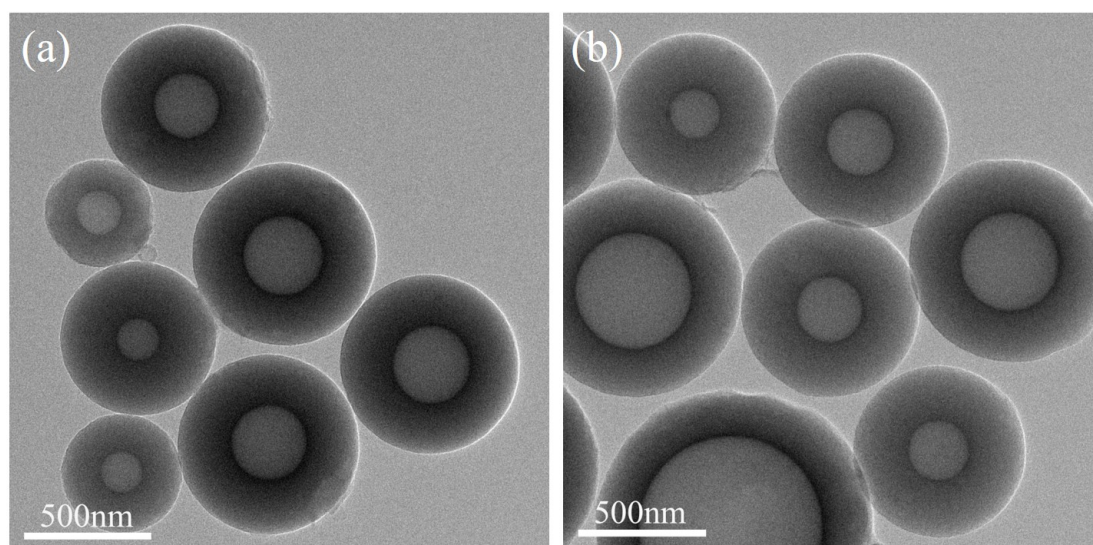

Fig. S3 TEM images of carbonized samples at 700°C (a) and 800°C (b).

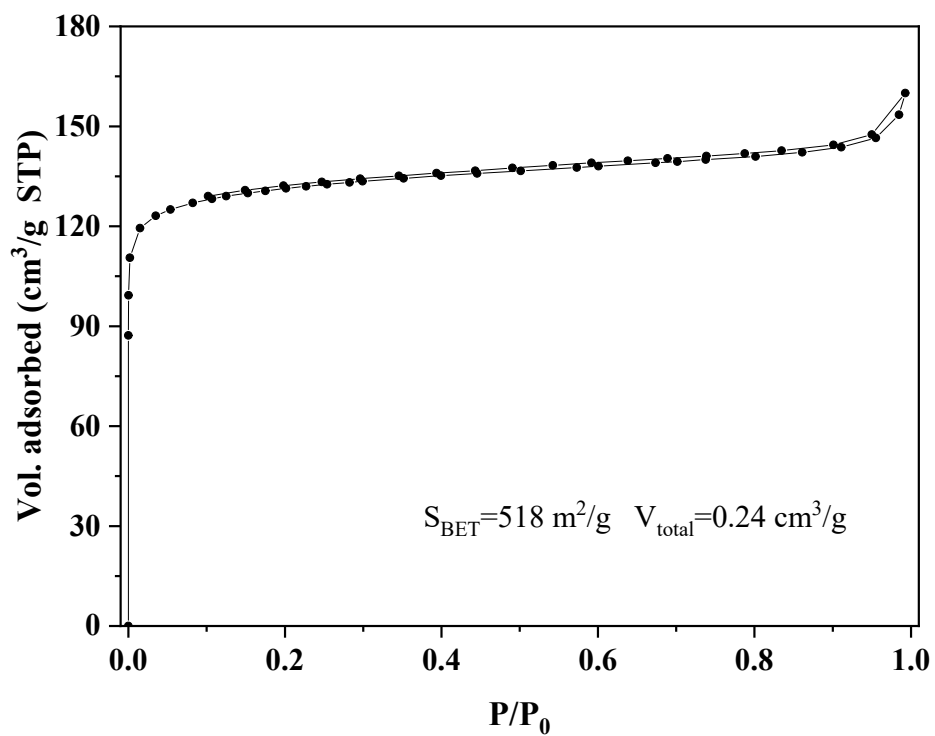

Fig. S4 N<sub>2</sub> physical adsorption/desorption isotherm of H-NC

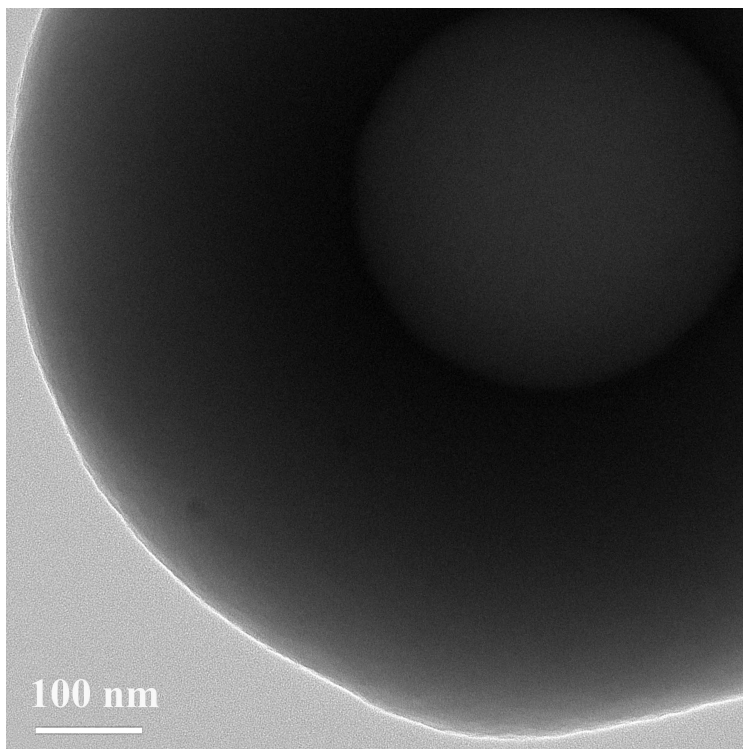

Fig. S5 TEM image of Pt/H-APF synthesized through same method as Au/H-APF

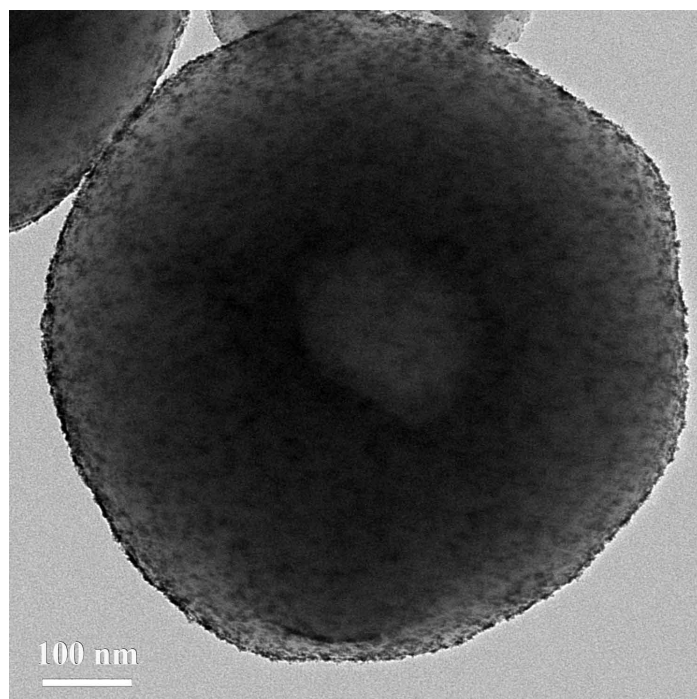

Fig. S6 TEM image of Pt/H-APF after 4 cycle reaction.

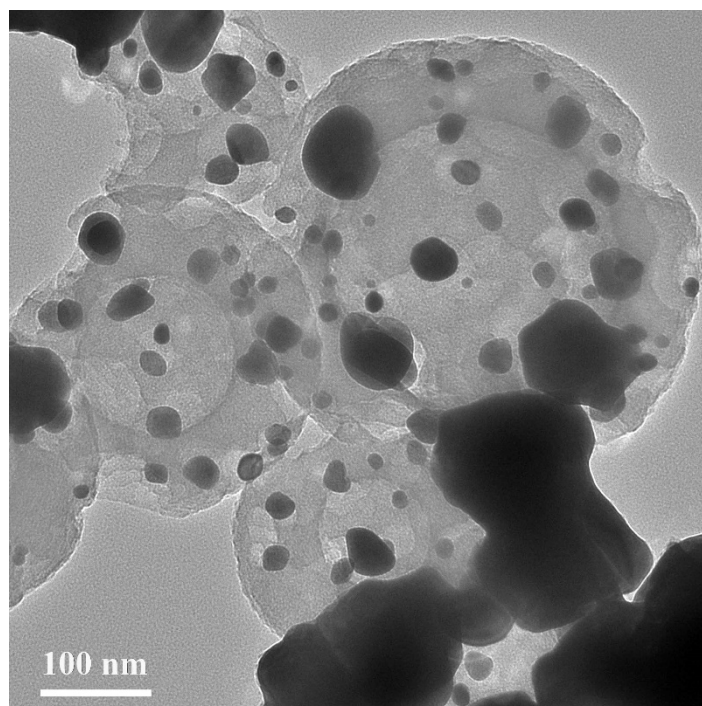

Fig. S7 TEM image of Au/H-APF after carbonization (600 °C for 4h)

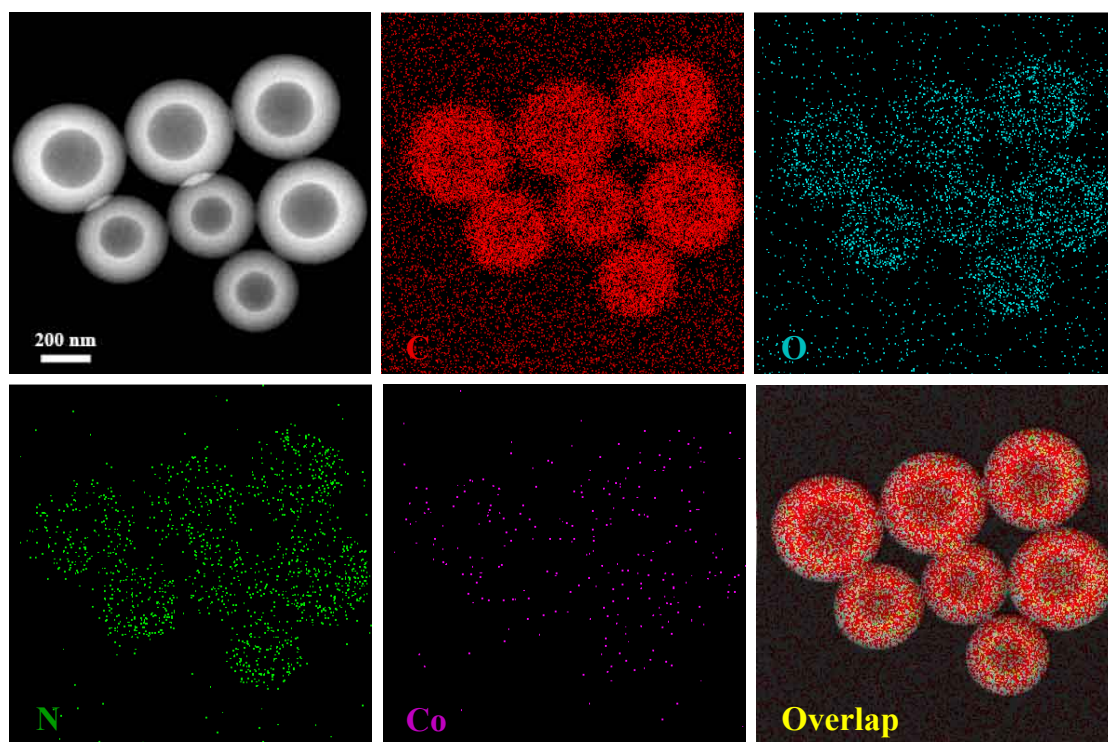

Fig. S8 Dark-field STEM image of H-Co-NC and corresponding element mapping.

Table S2 Summary of synthesis approaches for carbonaceous hollow sphere hybrids.

| Materials                       | Synthesis approach            | Precursors                                            | Conditions                                                                                            | Applications                               | Ref. |
|---------------------------------|-------------------------------|-------------------------------------------------------|-------------------------------------------------------------------------------------------------------|--------------------------------------------|------|
| Mesoporous carbon hollow sphere | Hard-templating approach      | Phenol, paraformaldehyde, poly(divinylbenzene)        | 373 K for 12 h + 403 K for 24 h, NaOH or HF leaching to remove SiO <sub>2</sub> template              |                                            | 1    |
| N-doped carbon hollow sphere    | Hard-templating approach, CVD | Benzene                                               | 900 °C and 1000 °C for 4 h, 20wt% HF leaching to remove SiO <sub>2</sub> template                     | Anodes in lithium-ion batteries            | 2    |
| Fe,N-doped carbon hollow sphere | Hard-templating approach      | Histidine                                             | SiO <sub>2</sub> template is modified by PDDA, PSS fore several times, HF leaching to remove template | Electrocatalytic oxygen reduction          | 3    |
| Pt,N-doped carbon hollow sphere | Hard-templating approach      | Dopamine hydrochloride                                | Carbon-coating and SiO <sub>2</sub> template removing                                                 | Electrocatalytic H <sub>2</sub> -evolution | 4    |
| NiS-doped carbon hollow sphere  | Hard-templating approach      | Resorcinol and formalin                               | Ni-silicate coating and CTAB modification and RF coating, template etching                            | Lithium-sulfur batteries                   | 5    |
| Hollow carbon nanoparticles     | Soft- templating approach     | $\alpha$ -cyclodextrin                                | F127 as soft template, 200 °C for 6 h                                                                 | Anodes in lithium-ion batteries            | 6    |
| Pt,Co-carbon hollow nanosphere  | Soft- templating approach     | 2, 4-dihydroxybenzoic acid and hexamethylenetetramine | P123/Sodium oleate emulsion as template, hydrothermal process                                         | Heterogeneous catalysis                    | 7    |

(continued on next page)

Table S2 (continued)

| Materials                                                 | Synthesis approach        | Precursors                     | Conditions                                                                                               | Applications                                                  | Ref.      |
|-----------------------------------------------------------|---------------------------|--------------------------------|----------------------------------------------------------------------------------------------------------|---------------------------------------------------------------|-----------|
| Multilevel hollow carbon sphere (N, Au, Pd doping)        | Self-templating approach  | 3-aminophenol and formaldehyde | Controlling polymerization degree by reducing time and adding organic solvent to etch the polymer.       | Heterogeneous catalysis                                       | 8         |
| Hollow carbon nanoshells                                  | Self-templating approach  | Resorcinol and formaldehyde    | Controlling polymerization degree by reducing time and adding organic solvent to etch the polymer.       |                                                               | 9         |
| carbonaceous hollow sphere with N, Au, Pt, Fe, Co dopants | One-pot synthesis process | 3-aminophenol and formaldehyde | Controlling polymerization degree by DDA/hexane and in-situ etched by mother liquid, ambient temperature | Heterogeneous catalysis and electrocatalytic oxygen reduction | This work |

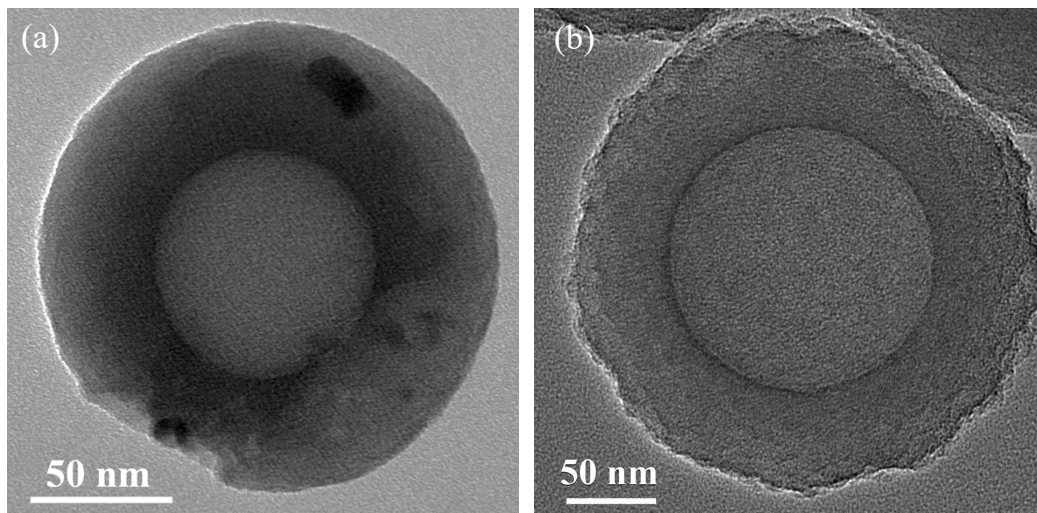

Fig. S9 TEM images of (a) H-Fe-NC and (b) H-Co-NC

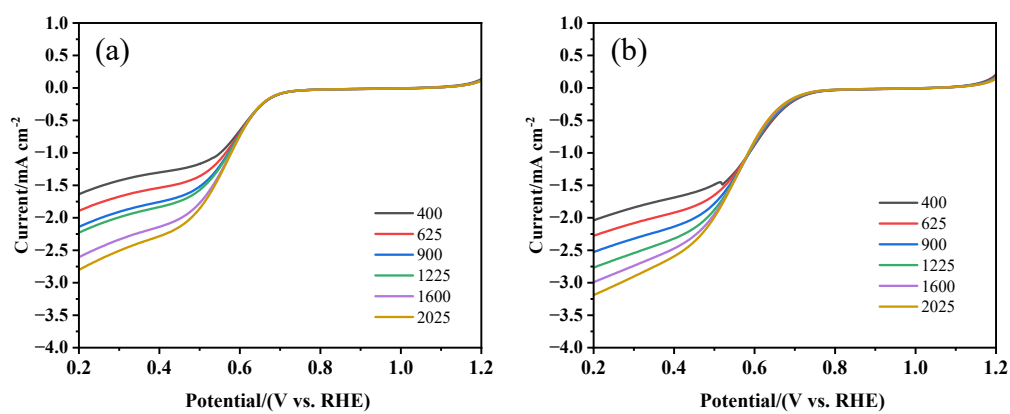

Fig. S10 LSV curves of (a) H-Fe-NC and (b) H-Co-NC at different rotating speeds

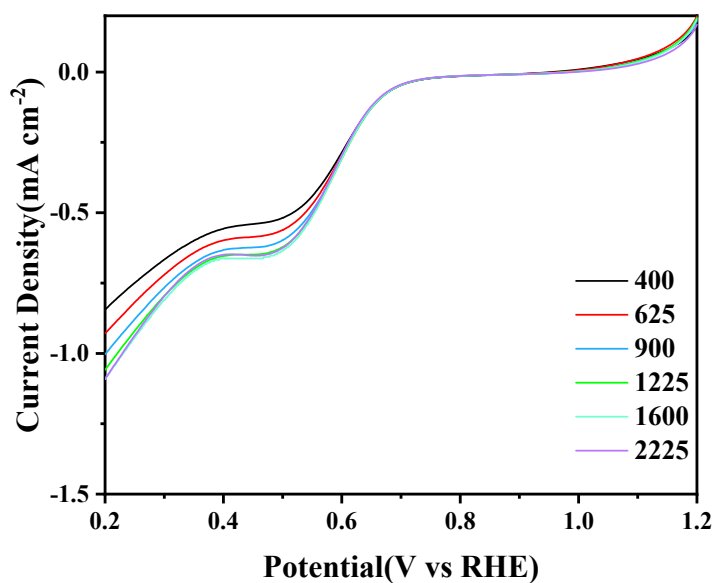

Fig. S11 LSV curves of H-NC at different rotating speeds

#### Reference

- 1 S. B. Yoon, K. Sohn, J. Y. Kim, C. H. Shin, J. S. Yu and T. Hyeon, *Adv Mater*, 2002, 14, 19 -21.
- 2 F. Su, X. S. Zhao, Y. Wang, L. Wang and J. Y. Lee, *J Mater Chem*, 2006, 16, 4413-4419.
- 3 Y. Chen, Z. Li, Y. Zhu, D. Sun, X. Liu, L. Xu and Y. Tang, *Adv Mater*, 2019, 31, 1806312.
- 4 P. Kuang, Y. Wang, B. Zhu, F. Xia, C.-W. Tung, J. Wu, H. M. Chen and J. Yu, *Adv Mater*, 2021, 33, 2008599.
- 5 C. Ye, L. Zhang, C. Guo, D. Li, A. Vasileff, H. Wang and S.-Z. Qiao, *Adv Funct Mater*, 2017, 1702524.
- 6 Z. Yang, Y. Zhang, J. Kong, S. Y. Wong, X. Li and J. Wang, *Chem Mater*, 2013, 25, 704-710.
- 7 G.-H. Wang, J. Hilgert, F. H. Richter, F. Wang, H.-J. Bongard, B. Splietho, C. Weidenthaler and F. Schüth, *Nat Mater*, 2014, 13, 294-301.
- 8 Y. T. Pi, Y. F. Ma, X. Y. Wang, C. A. H. Price, H. T. Li, Q. L. Liu, L. W. Wang, H. Y. Chen, G. J. Hou, B. L. Su and J. Liu, *Adv Mater*, 2022, 34, 2205153.
- 9 S. Zhou, Y. C. Bai, W. J. Xu, J. Feng, X. J. Wang, Z. W. Li and Y. D. Yin, *Nanoscale*, 2020, 12, 15460-15465.
